# Supplementary material
Source: PubMed Central journal article supplement (PMC3890840)
Supplement: 1303317110_pnas.201303317SI.pdf [file 1303317110_pnas.201303317SI.pdf]

# Supporting Information

Aziz et al. 10.1073/pnas.1303317110

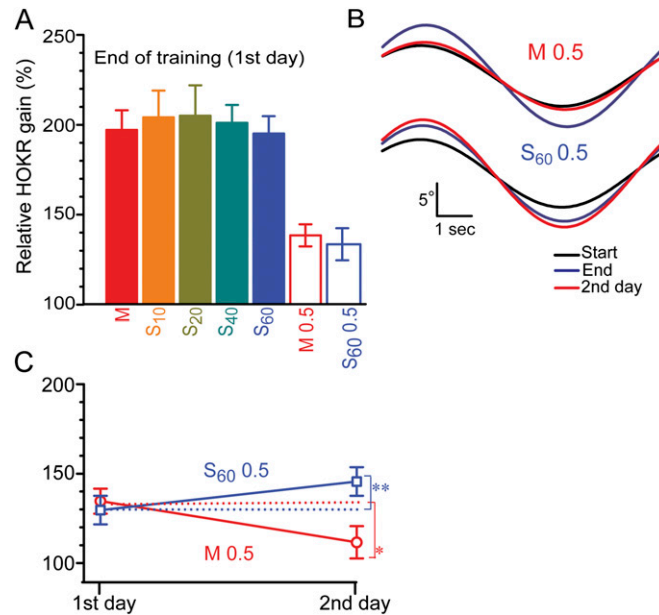

**Fig. S1.** The 0.5 h massed and spaced training (Fig. 1). (A) Relative horizontal optokinetic response (HOKR) gain was similar for all training protocols with 1 h and 0.5-h training ( $P < 0.05$ ; one-way ANOVA). (B) Representative eye traces from individual animals at the start (black), at the end (blue), and on the second day (red) after 0.5 h massed (M, M0.5) or spaced training (S<sub>60</sub>, S<sub>60</sub>0.5). (C) Pooled data on the first and second days after M0.5 ( $n = 5$ ; blue) and S<sub>60</sub>0.5 ( $n = 6$ ; red) training also show similar acquisition but significantly lower retention of HOKR gain by massed training compared with spaced training. \* $P < 0.05$  vs. end of training on the first day, paired  $t$  test.

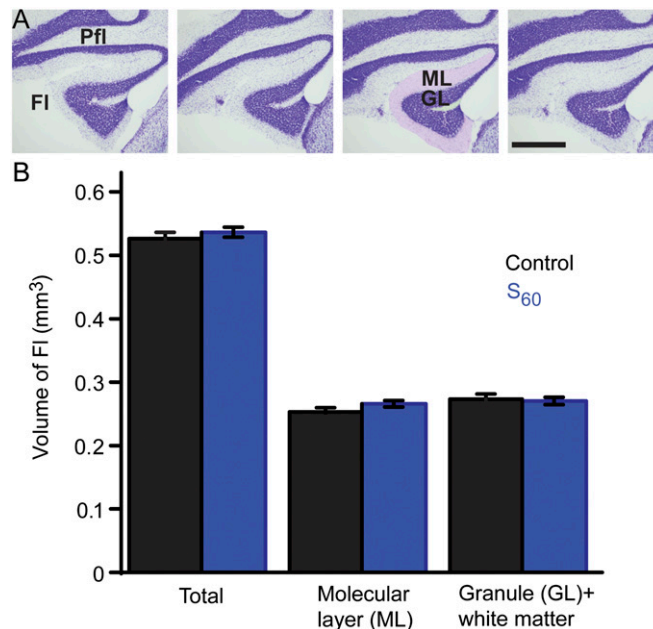

**Fig. S2.** No change in the volume of the floccular molecular layer after S<sub>60</sub> training (Fig. 4). (A) Nissl-stained serial sections of the flocculus (FI), which were used to measure the total volume including the molecular layer (ML), the granule cell layer (GL), and the white matter. (Scale bar, 200  $\mu$ m.) (B) No change was detected in the total volume or the molecular layer of the FI on the second day after S<sub>60</sub> training compared with the untrained control.
